# Supplementary material for: Nature of coexisting thyroid autoimmune disease determines success or failure of tumor immunity in thyroid cancer
Source: PubMed Central journal article supplement (PMC6323721; doi:10.1186/s40425-018-0483-y), 2019-01-07
Supplement: 40425_2018_483_MOESM2_ESM.pdf [file 40425_2018_483_MOESM2_ESM.pdf]

# Cytotoxicity of NK cells against K562 cancer target cells

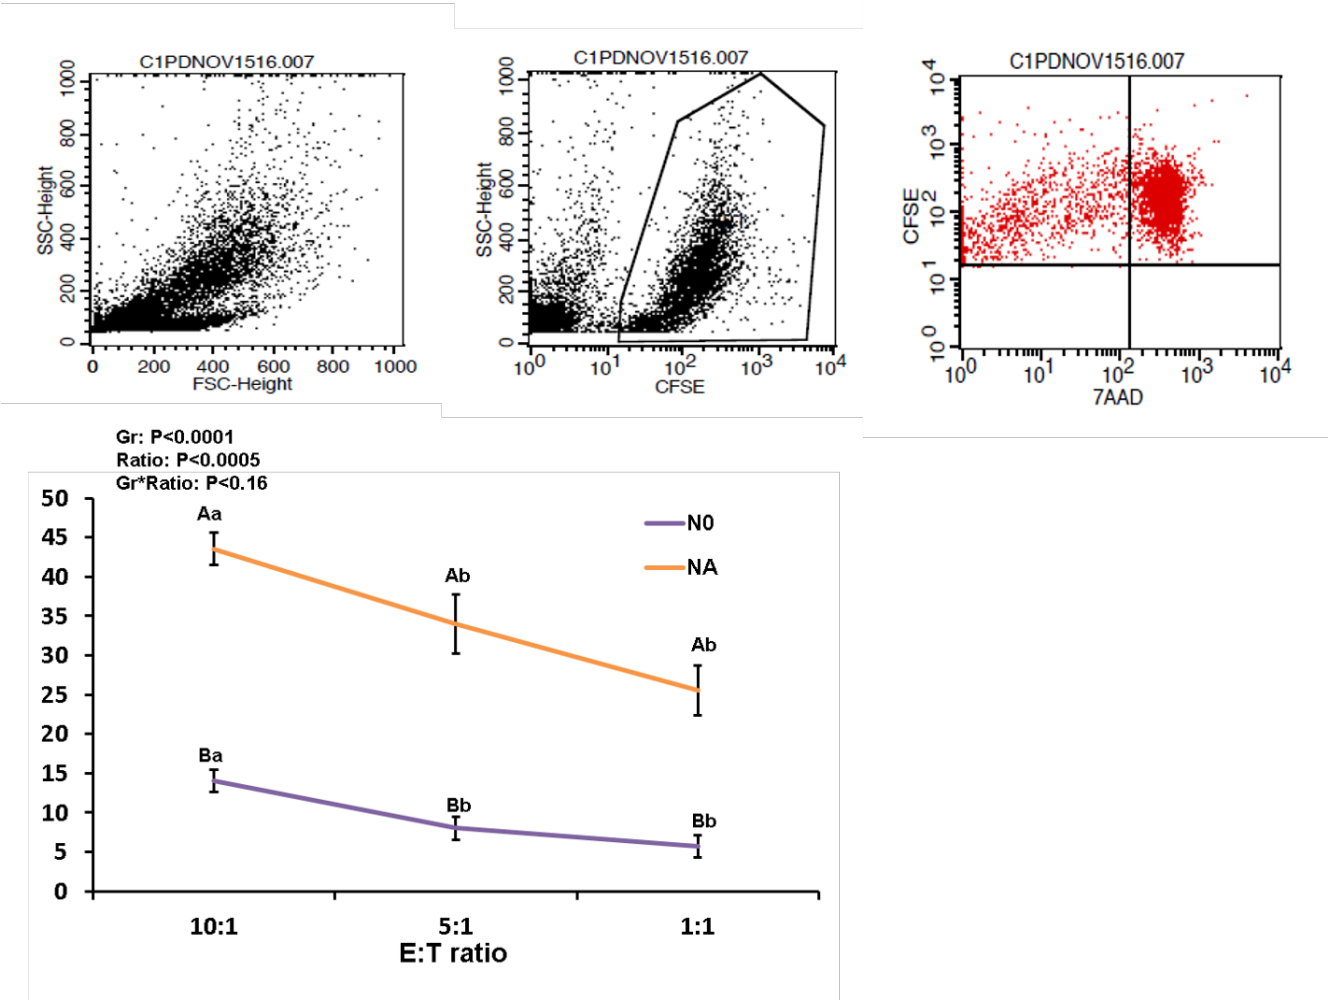

Supplement Fig. 2.
