# Supplementary material for: Nature of coexisting thyroid autoimmune disease determines success or failure of tumor immunity in thyroid cancer
Source: PubMed Central journal article supplement (PMC6323721; doi:10.1186/s40425-018-0483-y), 2019-01-07
Supplement: 40425_2018_483_MOESM3_ESM.pdf [file 40425_2018_483_MOESM3_ESM.pdf]

A) Gating strategies for flow cytometry analysis from representative patients with EHT and GD

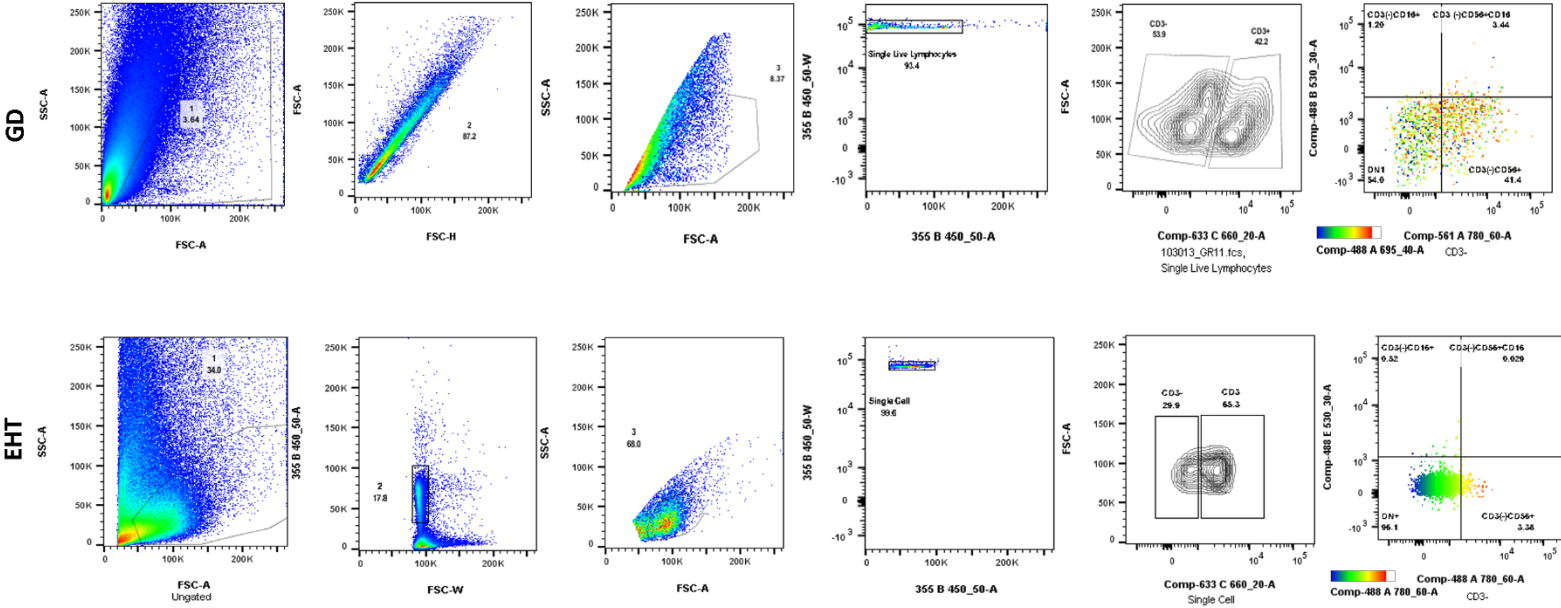

Supplement Fig. 1A.

**B) In-vitro NK cells –Macrophages crosstalk gating strategies:**

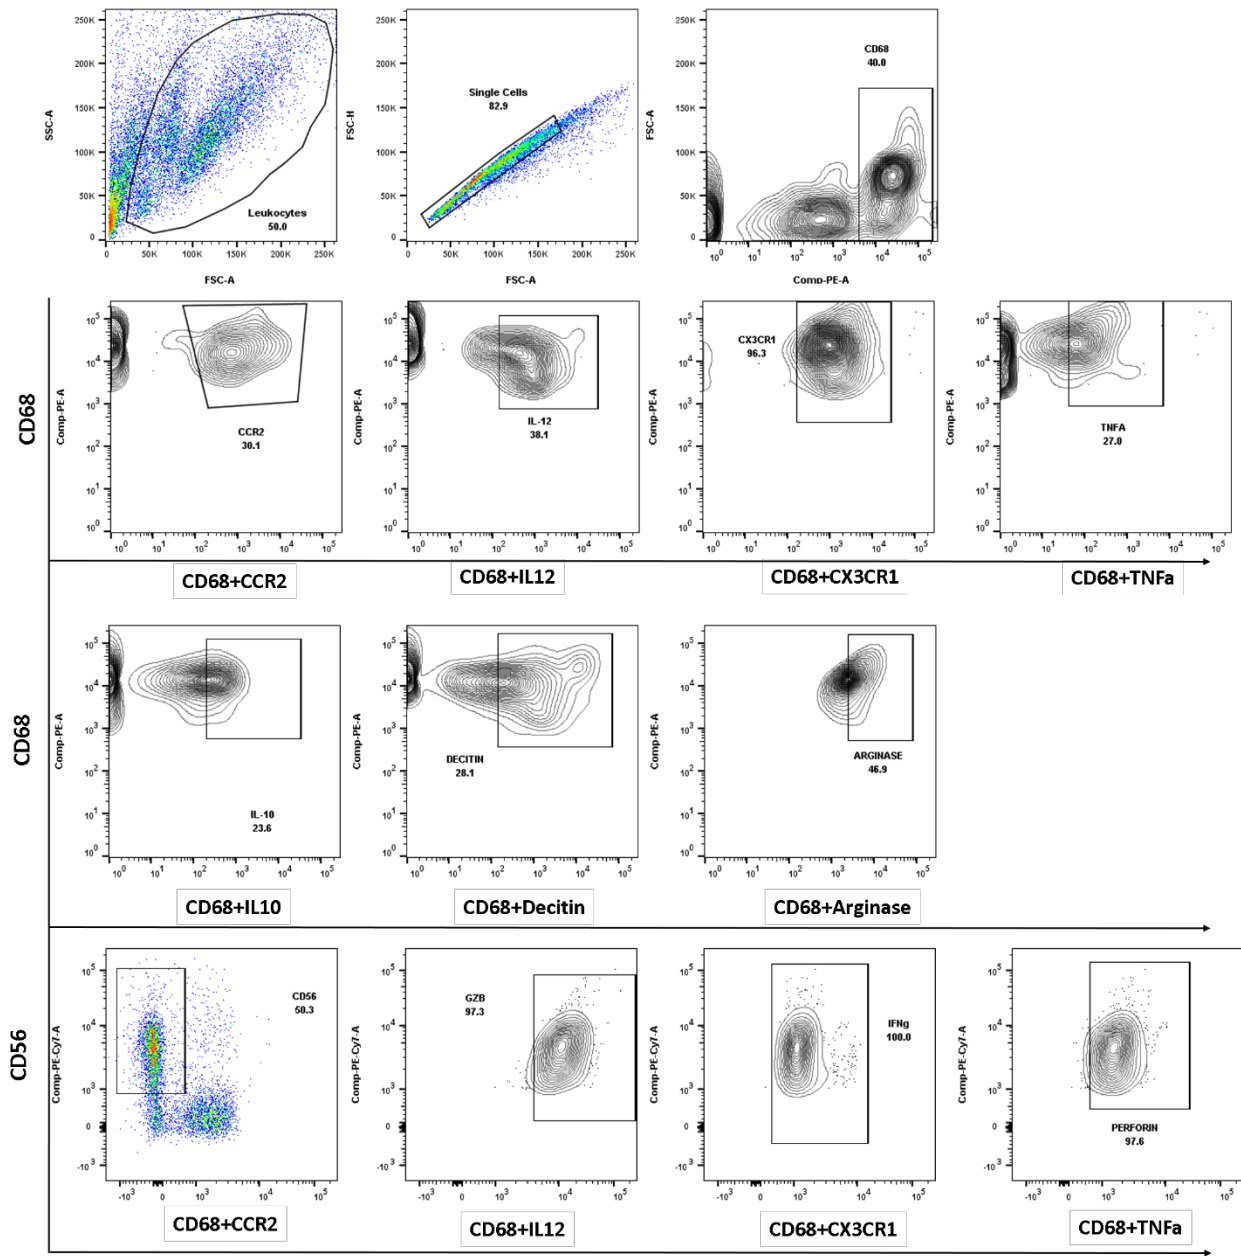

**Supplement Fig. 1B.**
